# Supplementary material for: Study design and baseline characteristics of a population-based prospective cohort study of dementia in Japan: the Japan Prospective Studies Collaboration for Aging and Dementia (JPSC-AD)
Source: Springer Nature journal article supplement (doi:10.1186/s12199-020-00903-3), 2020-10-31
Supplement: MOESM1 [file 18541696]

**Supplementary Table 1:** Instruments to measure blood pressure, electrocardiogram, and handgrip strength

| Parameter         | Research site | Measuring instrument | Manufacturing company                                                      |
|-------------------|---------------|----------------------|----------------------------------------------------------------------------|
| Blood pressure    | Hirosaki City | ES-P2000BR           | Terumo Corporation, Tokyo, Japan                                           |
|                   | Yahaba Town   | HBP-9020             | Omron Healthcare, Kyoto, Japan                                             |
|                   | Nakajima Town | HEM-8712             | Omron Healthcare, Kyoto, Japan                                             |
|                   | Arakawa Ward  | BP-103i II           | Fukuda Colin, Tokyo, Japan                                                 |
|                   | Ama Town      | H55                  | Terumo Corporation, Tokyo, Japan                                           |
|                   | Nakayama Town | HEM-8713             | Omron Healthcare, Kyoto, Japan                                             |
|                   | Hisayama Town | HBP-9020             | Omron Healthcare, Kyoto, Japan                                             |
|                   | Arao City     | TM-2656VPW           | A&D Company, Tokyo, Japan                                                  |
| Electrocardiogram | Hirosaki City | ECG-1350             | Nihon Kohden, Tokyo, Japan                                                 |
|                   | Yahaba Town   | FCP-8800             | Fukuda Denshi, Tokyo, Japan                                                |
|                   | Nakajima Town | FCP-8221             | Fukuda Denshi, Tokyo, Japan                                                |
|                   | Arakawa Ward  | FCP-8321             | Fukuda Denshi, Tokyo, Japan                                                |
|                   | Ama Town      | FCP-8221             | Fukuda Denshi, Tokyo, Japan                                                |
|                   | Nakayama Town | FCP-8221             | Fukuda Denshi, Tokyo, Japan                                                |
|                   | Hisayama Town | FCP-7541             | Fukuda Denshi, Tokyo, Japan                                                |
|                   | Arao City     | FCP-7431             | Fukuda Denshi, Tokyo, Japan                                                |
| Handgrip strength | Hirosaki City | T.K.K 5001           | Takei Scientific Instruments, Niigata, Japan                               |
|                   | Yahaba Town   | T.K.K.5401           | Takei Scientific Instruments, Niigata, Japan                               |
|                   | Nakajima Town | T.K.K.5401           | Takei Scientific Instruments, Niigata, Japan                               |
|                   | Arakawa Ward  | YS                   | Tsutsumi, Tokyo, Japan                                                     |
|                   | Ama Town      | T.K.K.5401           | Takei Scientific Instruments, Niigata, Japan                               |
|                   | Nakayama Town | T.K.K.5401           | Takei Scientific Instruments, Niigata, Japan                               |
|                   | Hisayama Town | 261-006-05YX         | Muranaka Medical Instruments, Osaka, Japan                                 |
|                   | Arao City     | T.K.K.5401<br>T-2177 | Takei Scientific Instruments, Niigata, Japan<br>TOEI LIGHT, Saitama, Japan |

**Supplementary Table 2: Measurement methods by item**

| Measurement item                 | Measuring method                             |
|----------------------------------|----------------------------------------------|
| <b>Blood test</b>                |                                              |
| White blood cells                | Flow cytometric method                       |
| Red blood cells                  | Bioelectrical impedance method               |
| Hemoglobin                       | Sodium lauryl sulfate-hemoglobin method      |
| Hematocrit                       | Red blood cell pulse height detection method |
| Platelet                         | Bioelectrical impedance method               |
| Total protein                    | Biuret method                                |
| Albumin                          | Modified bromocresol purple method           |
| Urea nitrogen                    | Urease and leucine dehydrogenase method      |
| Creatinine                       | Enzymatic method                             |
| Uric acid                        | Enzymatic method                             |
| Total bilirubin                  | Enzymatic method                             |
| Aspartate transaminase           | JSCC reference method                        |
| Alanine transaminase             | JSCC reference method                        |
| Alkaline phosphatase             | JSCC reference method                        |
| Lactate dehydrogenase            | JSCC reference method                        |
| $\gamma$ -glutamyl transferase   | JSCC reference method                        |
| Total cholesterol                | Enzymatic method                             |
| Serum HDL cholesterol            | Enzymatic method                             |
| Serum LDL cholesterol            | Enzymatic method                             |
| Triglycerides                    | Enzymatic method                             |
| Glucose                          | Enzymatic method                             |
| Hemoglobin A1c                   | Enzymatic method (NGSP)                      |
| Glycated albumin                 | Enzymatic method                             |
| Insulin                          | Chemiluminescent immunoassay                 |
| Sodium                           | Electrode method                             |
| Potassium                        | Electrode method                             |
| High-sensitivity CRP             | Nephelometric method                         |
| Free thyroxine (T <sub>4</sub> ) | Chemiluminescent immunoassay                 |
| Thyroid-stimulating hormone      | Chemiluminescent immunoassay                 |
| <b>Urine test</b>                |                                              |
| Urinary albumin                  | Turbidimetric immunoassay                    |
| Urinary creatinine               | Enzymatic method                             |

Abbreviations: CRP, C-reactive protein; HDL, high-density lipoprotein; JSCC, Japan Society of Clinical Chemistry; LDL, low-density lipoprotein.

**Supplementary Table 3:** The baseline characteristics for 5,257 subjects at three research sites (Nakajima Town, Nakayama Town, and Hisayama Town)

| Variables                                                     | Mean, median, or frequency <sup>a)</sup> | % of missing value |
|---------------------------------------------------------------|------------------------------------------|--------------------|
| <b>Demographic factors and lifestyles</b>                     |                                          |                    |
| Age, years                                                    | 76.7 (8.2)                               | 0.0                |
| Men, %                                                        | 42.0                                     | 0.0                |
| Education ≤9 years, %                                         | 46.6                                     | 11.0               |
| Current smoker, %                                             | 36.0                                     | 10.1               |
| Current drinker, %                                            | 7.8                                      | 10.1               |
| Regular exercise <sup>b)</sup> , %                            | 31.8                                     | 24.0               |
| <b>Physical examinations</b>                                  |                                          |                    |
| Systolic blood pressure, mmHg                                 | 136.1 (19.2)                             | 25.0               |
| Diastolic blood pressure, mmHg                                | 75.8 (12.1)                              | 25.0               |
| BMI, kg/m <sup>2</sup>                                        | 23.3 (3.5)                               | 23.3               |
| Waist circumference (at umbilicus), cm                        | 85.4 (9.7)                               | 29.8               |
| Electrocardiogram abnormalities <sup>c)</sup> , %             | 17.5                                     | 32.9               |
| <b>Comorbidities and medications</b>                          |                                          |                    |
| History of cardiovascular disease <sup>d)</sup> , %           | 15.1                                     | 6.5                |
| History of cancer, %                                          | 13.5                                     | 6.4                |
| Hypertension <sup>e)</sup> , %                                | 71.2                                     | 9.8                |
| Diabetes mellitus <sup>f)</sup> , %                           | 23.2                                     | 27.6               |
| Use of antihypertensive agents, %                             | 55.3                                     | 8.2                |
| Use of glucose-lowering agents (including insulin therapy), % | 15.0                                     | 8.4                |
| Use of lipid-modifying agents, %                              | 32.0                                     | 8.7                |
| <b>Blood test</b>                                             |                                          |                    |
| White blood cells, x10 <sup>9</sup> /L                        | 5.6 (1.6)                                | 29.0               |
| Red blood cells, x10 <sup>12</sup> /L                         | 4.3 (0.5)                                | 29.0               |
| Hemoglobin, g/L                                               | 134.7 (15.7)                             | 29.0               |
| Hematocrit, %                                                 | 41.1 (4.5)                               | 29.0               |
| Platelet, x10 <sup>9</sup> /L                                 | 227.1 (67.9)                             | 29.0               |
| Serum total protein, g/L                                      | 73.2 (4.7)                               | 31.1               |
| Serum albumin, g/L                                            | 42.3 (3.2)                               | 31.1               |
| Serum urea nitrogen, mmol/L                                   | 6.2 (2.0)                                | 31.1               |
| Serum creatinine, μmol/L                                      | 65.4 (55.7-79.6)                         | 31.1               |
| Estimated GFR <sup>g)</sup> , ml/min/1.73m <sup>2</sup>       | 65.7 (12.8)                              | 31.1               |
| Serum uric acid, μmol/L                                       | 309.3 (81.0)                             | 31.1               |
| Serum total bilirubin, μmol/L                                 | 13.7 (10.3-15.4)                         | 31.1               |
| Serum aspartate transaminase, U/L                             | 23 (20-28)                               | 31.1               |
| Serum alanine transaminase, U/L                               | 17 (13-23)                               | 31.1               |
| Serum alkaline phosphatase, U/L                               | 232 (192-281)                            | 31.1               |
| Serum lactate dehydrogenase, U/L                              | 203 (181-227)                            | 31.1               |

|                                                                     |                  |      |
|---------------------------------------------------------------------|------------------|------|
| Serum $\gamma$ -glutamyl transferase, U/L                           | 22 (16-35)       | 31.1 |
| Serum total cholesterol, mmol/L                                     | 5.1 (0.9)        | 31.1 |
| Serum LDL cholesterol, mmol/L                                       | 2.9 (0.8)        | 31.1 |
| Serum HDL cholesterol, mmol/L                                       | 1.5 (0.4)        | 31.1 |
| Fasting serum triglycerides, mmol/L                                 | 1.1 (0.8-1.5)    | 61.0 |
| Fasting blood glucose, mmol/L                                       | 5.3 (1.2)        | 61.0 |
| Hemoglobin A1c (NGSP), %                                            | 5.8 (0.7)        | 31.1 |
| Serum glycated albumin, %                                           | 15.8 (2.9)       | 33.9 |
| Serum sodium, mmol/L                                                | 141.6 (2.3)      | 31.4 |
| Serum potassium, mmol /L                                            | 4.5 (0.7)        | 31.1 |
| Serum high-sensitivity CRP, mg/L                                    | 0.48 (0.23-1.03) | 31.2 |
| Serum free thyroxine (T <sub>4</sub> ), pmol/L                      | 14.6 (2.2)       | 31.2 |
| Serum thyroid stimulating hormone, $\mu$ IU/mL                      | 1.90 (1.27-2.88) | 31.2 |
| <b>Urine test</b>                                                   |                  |      |
| Proteinuria (dipstick $\geq$ 1+), %                                 | 9.1              | 34.5 |
| Urinary albumin:creatinine ratio, mg/gCr                            | 11.6 (6-29.3)    | 35.5 |
| <b>ADL and Sleep</b>                                                |                  |      |
| ADL disability (Barthel Index $\leq$ 95), %                         | 19.9             | 2.8  |
| Functional capacity impairment (TMIG-IC $\leq$ 12), %               | 53.1             | 10.1 |
| Maximal handgrip strength, kg                                       | 25.8 (9.1)       | 18.6 |
| Usual speed 5-m walking time, sec                                   | 4.5 (1.8)        | 39.0 |
| <b>Cognitive function</b>                                           |                  |      |
| Mini-Mental State Examination, points                               | 28 (25-29)       | 14.3 |
| <b>Depressive status</b>                                            |                  |      |
| Geriatric depression scale, points                                  | 2 (1-4)          | 17.1 |
| Depressive symptoms (Geriatric depression scale $\geq$ 6 points), % | 17.6             | 17.1 |
| Depression, %                                                       | 1.4              | 0.0  |

Abbreviations: ADL, activities of daily living; BMI, body mass index; CRP, C-reactive protein; HDL, high density lipoprotein; LDL, low-density lipoprotein; NGSP, National Glycohemoglobin Standardization Program; TMIG-IC, Tokyo Metropolitan Institute of Gerontology Index of Competence; Uprot, urinary protein concentration.

a) Values are shown as the mean (standard deviation), median (interquartile range), or frequency, as appropriate. Subjects with missing values were excluded from the analysis for each relevant variable.

b) Regular exercise was defined as any physical activity performed for at least 30 min twice per week over the most recent year or longer.

c) Electrocardiogram abnormalities were defined as the presence of left ventricular hypertrophy, ST depression, and/or atrial fibrillation.

d) Cardiovascular disease was defined as stroke, coronary heart disease and/or coronary intervention.

e) Hypertension was defined as blood pressure  $\geq$ 140/90 mmHg and/or use of antihypertensive agents.

f) Diabetes was defined as fasting blood glucose  $\geq$ 126 mg/dL, casual blood glucose  $\geq$ 200 mg/dL, hemoglobin A1c  $\geq$ 6.5%, and/or glucose-lowering agents.

g) Estimated GFR was calculated by using the Japanese coefficient modified CKD-EPI (Chronic Kidney Disease Epidemiology Collaboration) equation.

Note: Conversion factors for units are shown at the footnote in Table 1.

**Supplementary Table 4:** Age-specific prevalence of dementia at baseline among 5,257 subjects at three research sites (Nakajima Town, Nakayama Town, and Hisayama Town<sup>a</sup>); participation rate: 85%), where surveys by home visit or visits to nursing homes or other facilities (e.g., long-stay hospitals) were conducted in addition to the surveys at the health centres or hospital.

| Age group, years | Number of subjects | Number of dementia | Prevalence of dementia |
|------------------|--------------------|--------------------|------------------------|
| <b>Overall</b>   |                    |                    |                        |
| 65-69            | 1,314              | 19                 | 1.4%                   |
| 70-74            | 1,049              | 37                 | 3.5%                   |
| 75-79            | 992                | 101                | 10.2%                  |
| 80-84            | 862                | 180                | 20.9%                  |
| 85-89            | 639                | 272                | 42.6%                  |
| ≥90              | 401                | 251                | 62.6%                  |
| <b>Total</b>     | <b>5,257</b>       | <b>860</b>         | <b>16.4%</b>           |
| <b>Men</b>       |                    |                    |                        |
| 65-69            | 628                | 9                  | 1.4%                   |
| 70-74            | 493                | 16                 | 3.2%                   |
| 75-79            | 416                | 40                 | 9.6%                   |
| 80-84            | 355                | 67                 | 18.9%                  |
| 85-89            | 215                | 73                 | 34.0%                  |
| ≥90              | 101                | 43                 | 42.6%                  |
| <b>Total</b>     | <b>2,208</b>       | <b>248</b>         | <b>11.2%</b>           |
| <b>Women</b>     |                    |                    |                        |
| 65-69            | 686                | 10                 | 1.5%                   |
| 70-74            | 556                | 21                 | 3.8%                   |
| 75-79            | 576                | 61                 | 10.6%                  |
| 80-84            | 507                | 113                | 22.3%                  |
| 85-89            | 424                | 199                | 46.9%                  |
| ≥90              | 300                | 208                | 69.3%                  |
| <b>Total</b>     | <b>3,049</b>       | <b>612</b>         | <b>20.1%</b>           |

a) In Hisayama Town, surveys by home visit and visits to nursing homes or other facilities were conducted for 488 residents (184 men and 304 women) in addition to 1,714 participants of the JPSC-AD study.

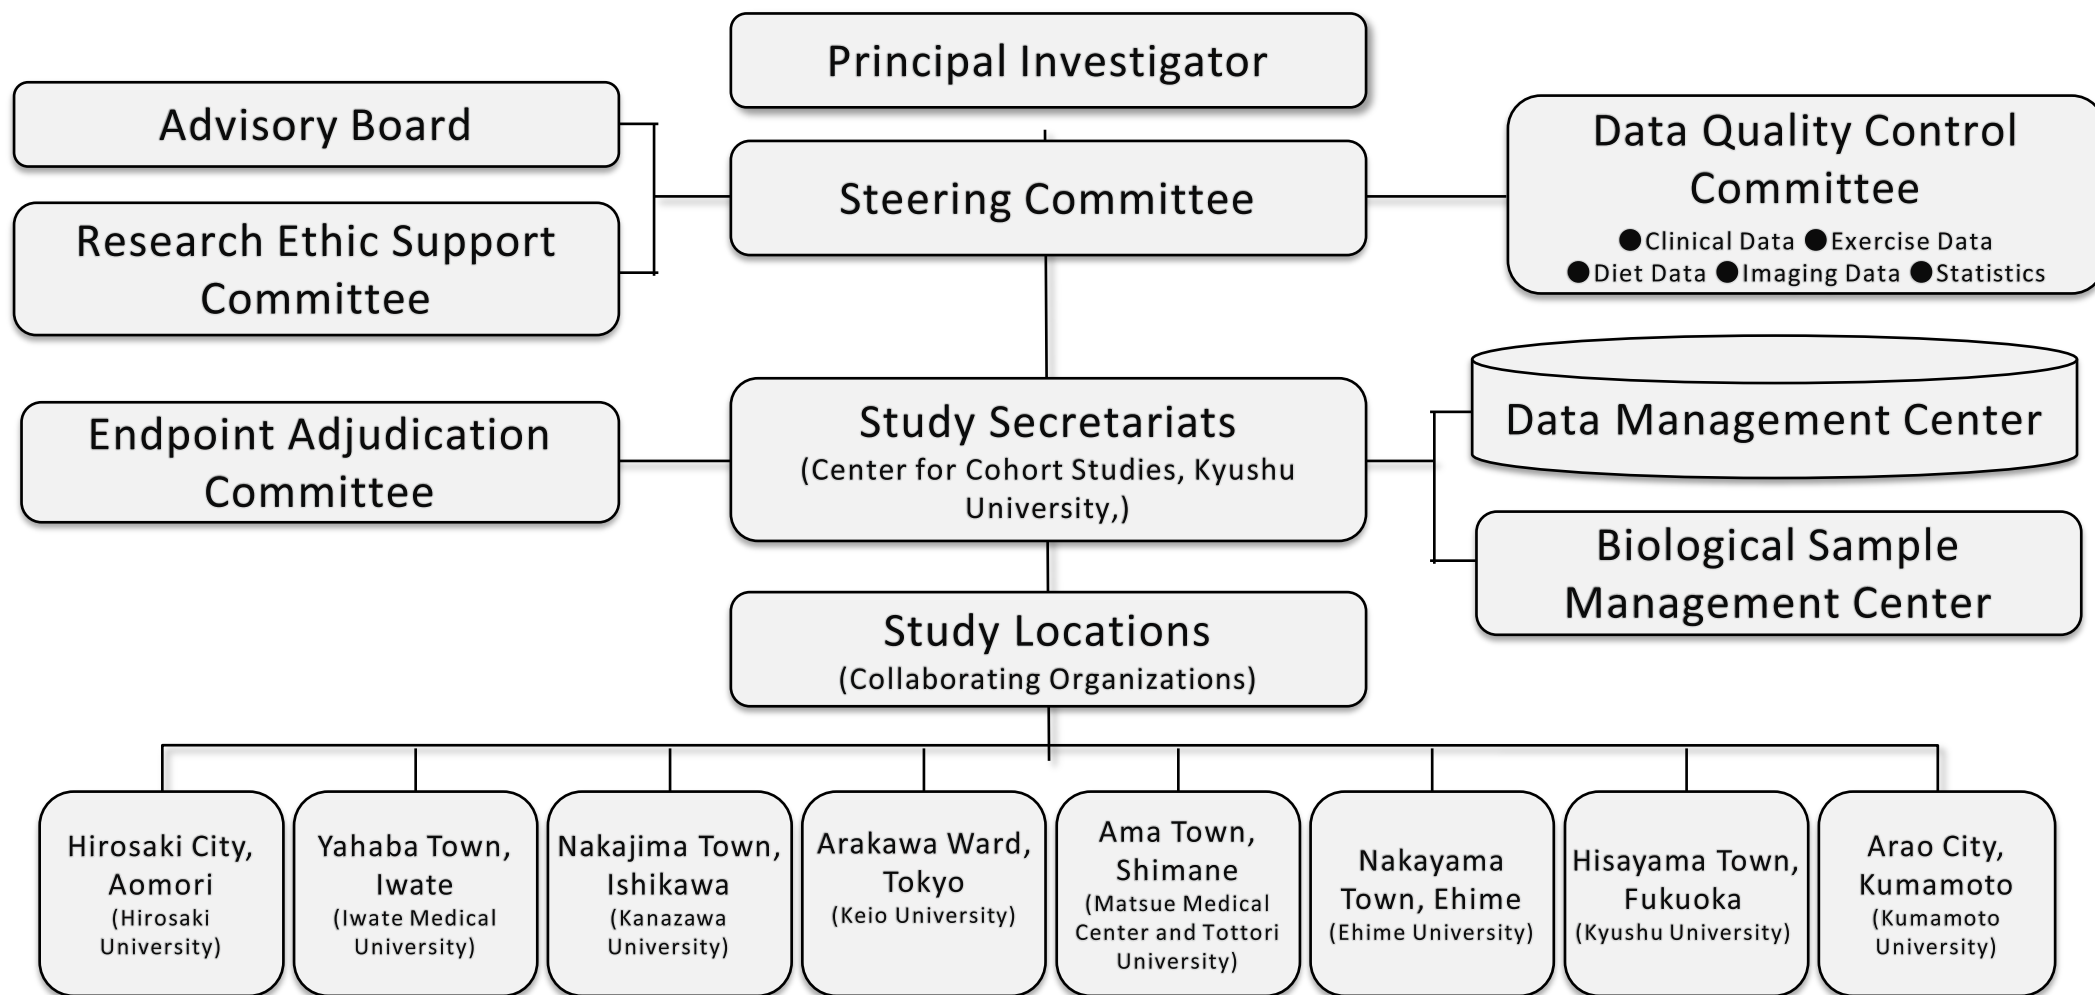

**Supplementary Figure 1: Organization of the Japan Prospective Studies Collaboration for Aging and Dementia (JPSC-AD)**
